# Supplementary figures and images for: Manganese complexes of mixed O, X, O-donor ligands (X = S or Se): synthesis, characterization and catalytic reactivity
Source: Royal Society of Chemistry journal article supplement (doi:10.1039/b304765m), 2003-01-01

Figure S1

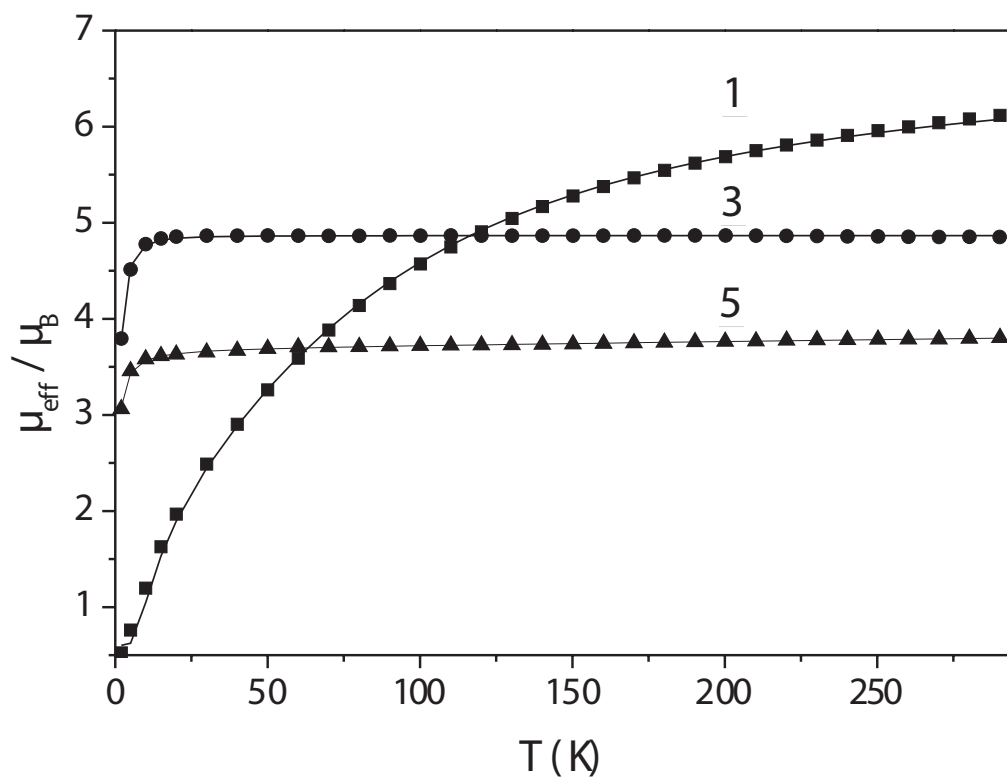

Figure S2

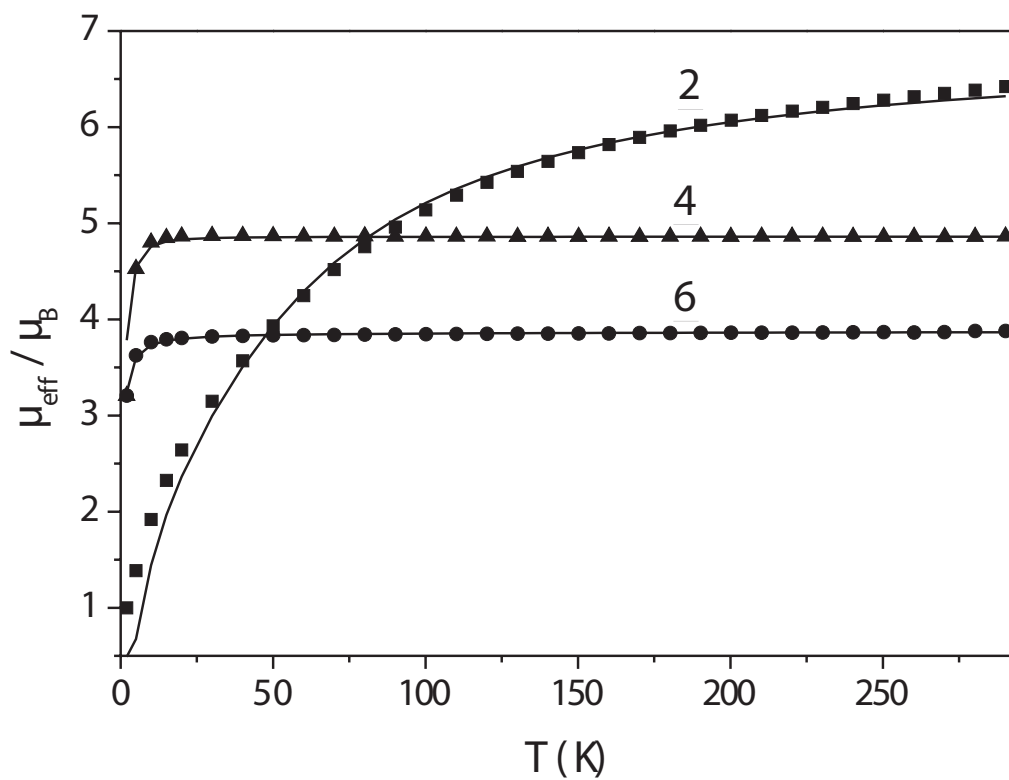

Supplement: b304765m.pdf [file b304765m.pdf]
